# Supplementary material for: Application of Trio-Whole Exome Sequencing in Genetic Diagnosis and Therapy in Chinese Children With Epilepsy
Source: Front Mol Neurosci. 2021 Aug 19;14:699574. doi: 10.3389/fnmol.2021.699574 (PMC8417468; doi:10.3389/fnmol.2021.699574)
Supplement: Supplementary Table 1 — The information of the public databases used in Chigene database. [file Table_1.XLSX]

## Sheet: suppl tabel 1 
Category	Databases and soft wares
Sequence databases	NCBI Genome(http://www.ncbi.nlm.nih.gov/genome) Locus Reference Genomic(http://www.lrg-sequence.org) UCSC(https://genome.ucsc.edu/cgi-bin/hgGateway)
Population databases	dbSNP(dbSNP: https://www.ncbi.nlm.nih.gov/projects/SNP/) 1,000 Genomes (https://www.ncbi.nlm.nih.gov/variation/tools/1000genomes/) Chigene Local (in-house) Database ExAC(http: //exac.broadinstitute.org/) ESP(http://evs.gs.washington.edu/) gnomAD(https://gnomad.broadinstitute.org/)
Disease databases	HGMD(http://www.hgmd.cf.ac.uk/) LOVD(http://www.lovd .nl/3.0/home) OMIM(https://www.omim.org/) Clinvar(https://www.ncbi.nlm.nih.gov/clinvar/) SWISS(https://swissvar.expasy.org /cgi-bin/swissvar/home) Clinvitae(http://clinvitae.invitae.com/) ClinGen(https://www.clinicalgenome.org/) Decipher(https://decipher.sanger.ac.uk/) DGV(http://dgv.tcag.ca/) ISCA(http://dbsearch.clinicalgenome.org/search/) Ge…
Missense prediction	Provean(http://provean.jcvi.org/) Polyphen2(http://genetics.bwh.harvard.edu/pph2/) MutationTaster(http://www.mutationtaster.org/) M-CAP(http://bejerano. Stanford.edu/mcap/) REVEL(https://labworm.com/tool/revel)
Splice site prediction	MaxEntScan(http://genes.mit.edu/burgelab/maxent/Xmaxentscan_scoreseq.html) dbscSNV(https://github.com/Ensembl/VEP_plugins/blob/release/93/dbscSNV.pm) GTAG(https://www.coursehero.com/file/p440rq0 /Splicing-of-an-GTAG-DNA-or-GUAG-RNA-intron-most-common-splicing-site-on/)
Nucleotide conservation prediction	GERP++(http://mendel.stanford.edu/SidowLab/downloads/gerp/index.html) phyloP(http://compgen.bscb.cornell.edu/phast) phastCons(http://compgen.cshl.edu/phast/)
